# Supplementary material for: Mixed methods evaluation of implementation and outcomes in a community-based cancer prevention intervention
Source: Springer Nature journal article supplement (doi:10.1186/s12889-019-7315-y), 2019-08-05
Supplement: MOESM1 [file 17039644]

**Additional File 1. Cooking for a Lifetime of Cancer Prevention (C4L) Program Instructor Training Agenda**

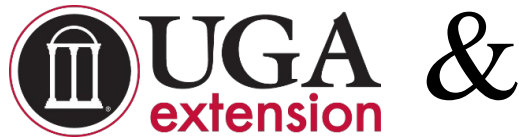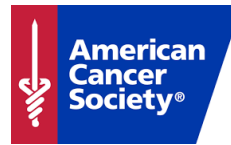

## Training for Cooking for a Lifetime of Cancer Prevention (C4L)

**Wednesday, November 9, 2016**

Macon, GA

### **9:30 a.m. – 3:30 p.m.**

|                         |                                                                        |
|-------------------------|------------------------------------------------------------------------|
| 9:30 a.m. – 9:45 a.m.   | Welcome/Introduction                                                   |
| 9:45 a.m. – 10:00 a.m.  | UGA & ACS/NBCCEDP Partnership                                          |
| 10:00 a.m. – 10:30 a.m. | Overview of C4L Format/Delivery                                        |
| 10:30 a.m. – 11:00 a.m. | ACS Cancer Presentation (reminder of ACS Guidelines/BCCP requirements) |
| 11:00 a.m. – 12:00 p.m. | UGA Cancer Prevention Presentation                                     |
| 12:00 p.m. – 12:45 p.m. | Working Lunch                                                          |
| 12:45 p.m. – 1:15 p.m.  | C4L Evaluation – changes, consent forms, incentives                    |
| 1:15 p.m. – 1:45 p.m.   | Recruiting the target audience: women without insurance                |
| 1:45 p.m. – 2:30 p.m.   | Planning your programs                                                 |
| 2:30 p.m. – 3:00 p.m.   | Sharing Your Plans                                                     |
| 3:00 p.m. – 3:30 p.m.   | Q & A/Wrap up                                                          |
